# Supplementary material for: CRISPR/Cas9-Mediated Mutagenesis of Sex-Specific Doublesex Splicing Variants Leads to Sterility in Spodoptera frugiperda, a Global Invasive Pest
Source: MDPI journal article supplement (doi:10.3390/cells11223557), 2022-11-10
Supplement: s1 [file s1]

## Supplementary Materials

### Figure

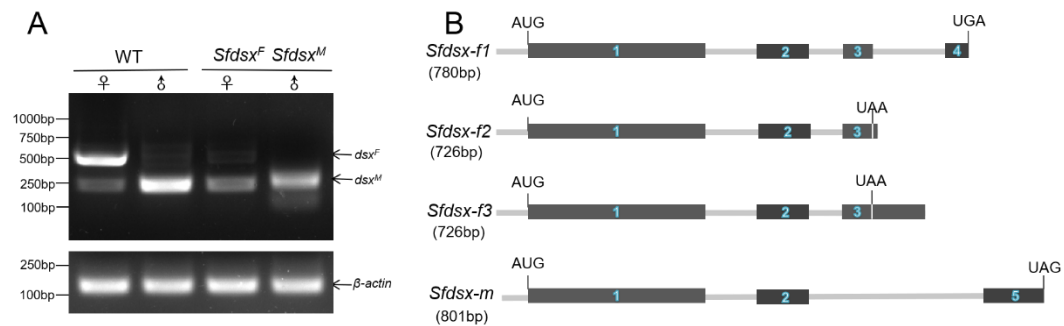

**Figure S1. Alternative splicing patterns of *Sfdsx* gene.** (A) RT-PCR was conducted to verify alternative splicing of *Sfdsx* gene in wild-type and *Sfdsx* mutant insects. The arrows indicate female- and male-specific splicing of *Sfdsx* flanking 500 and 250bp sequences respectively. The *β-actin* gene was used as an internal control. (B) Genomic structure of *Sfdsx* gene. Four different alternative splicing patterns including three for females and one for male of sex-specific *Sfdsx* transcripts are shown. Exons are represented by boxes with labeling and introns are shown by lines.

# Table

**Table S1. Primers used in this study.**

| Name                           | Sequence (5'-3')                                                                         | Purpose                                       |
|--------------------------------|------------------------------------------------------------------------------------------|-----------------------------------------------|
| <i>dsx<sup>C</sup></i> -sgF    | TAATACGACTCACTATAGGGGTCCATATGTTCCCTG<br>CGTTTTAGAGCTAGAAATAGCAA                          | sgRNA synthesis                               |
| <i>dsx<sup>F</sup></i> -sgF    | TAATACGACTCACTATAGGGGAAATTAATAATATAA<br>GGTTTTAGAGCTAGAAATAGCAA                          |                                               |
| <i>dsx<sup>M</sup></i> -sgF    | TAATACGACTCACTATAGGATTACGCAGGCAGTGA<br>CGGTTTTAGAGCTAGAAATAGCAA                          |                                               |
| sgR                            | AAAAGCACCGACTCGGTGCCACTTTTTCAAGTTGA<br>TAACGGACTAGCCTTATTTTAACTTGCTATTTCTAGC<br>TCTAAAAC |                                               |
| <i>dsx<sup>C</sup></i> -site-F | AGCAGAGAACACTGATCCCTTA                                                                   | Mutagenesis<br>detection on genomic<br>DNA    |
| <i>dsx<sup>C</sup></i> -site-R | TTTGTAACGAACGCTAAAAAGC                                                                   |                                               |
| <i>dsx<sup>F</sup></i> -site-F | CACGTTCCACACACAAAGTG                                                                     |                                               |
| <i>dsx<sup>F</sup></i> -site-R | AGACGGCAAACAAACGTCTC                                                                     |                                               |
| <i>dsx<sup>M</sup></i> -site-F | GTTTCACGCCAGCTTTTCTT                                                                     |                                               |
| <i>dsx<sup>M</sup></i> -site-R | CTGCTTTGGCTCCTATTGAT                                                                     |                                               |
| <i>β-actin</i> -qF             | CGGTATCGTGCTGGACTCCGGTG                                                                  | Relative transcript<br>analysis by RT-qPCR    |
| <i>β-actin</i> -qR             | GAGTAACCCCTCTCGGTGAGGATC                                                                 |                                               |
| <i>dsx</i> -qF                 | AAGCTGTTGGAGAAGTTCCACT                                                                   |                                               |
| <i>dsx</i> -qR                 | TATTTTCCGTGATGCCTCGT                                                                     |                                               |
| <i>OR1</i> -F                  | GCAGGCATGTTTCAGAGATGA                                                                    |                                               |
| <i>OR1</i> -R                  | ACCCCATAGATGGAACACCA                                                                     |                                               |
| <i>PBP1</i> -F                 | ACGCTAGATGGAGGGTTGTG                                                                     |                                               |
| <i>PBP1</i> -R                 | CCGGTTGATGAGCTGGTACT                                                                     |                                               |
| <i>PBP2</i> -F                 | GCACAAGAATTGCCATGAA                                                                      |                                               |
| <i>PBP2</i> -R                 | CACTTCTCCACGACGAGTT                                                                      |                                               |
| <i>dsx</i> -cloneF             | CTTAGTGGATAACTGTAACAAGCTG                                                                | Identification of sex-<br>specific transcript |
| <i>dsx</i> -cloneR             | GTACTCCGTGAAGCACATGG                                                                     |                                               |
